# Supplementary material for: Youths’ and Young Adults’ Experiences of Police Involvement During Initiation of Involuntary Psychiatric Holds and Transport
Source: Atypon-hosted journal article supplement (doi:10.1176/appi.ps.202100263), 2021-12-16
Supplement: appi.ps.202100263.ds001.pdf [file appi.ps.202100263.ds001.pdf]

Table A

Participant Race, Ethnicity & Gender & Police Interactions (n = 28)

|                                                                    | Black<br>(n=3) | White<br>(n = 11) | Latinx<br>(n = 11) | Asian<br>(n=2) | Multiracial<br>(n = 1) | Male<br>(n =<br>8) | Female<br>(n =<br>20) |
|--------------------------------------------------------------------|----------------|-------------------|--------------------|----------------|------------------------|--------------------|-----------------------|
| Negative<br>experience<br>overall(n =<br>16)                       | 3              | 7                 | 8                  | 1              | 0                      | 3                  | 13                    |
| Neutral<br>experience<br>overall<br>(n = 8)                        | 0              | 4                 | 4                  | 1              | 0                      | 2                  | 6                     |
| Positive<br>Experience<br>overall<br>(n = 4)                       | 0              | 2                 | 1                  | 0              | 1                      | 3                  | 1                     |
| Handcuffed<br>(n=7)                                                | 0              | 4                 | 2                  | 0              | 0                      | 3                  | 4                     |
| Police<br>officer was<br>a school<br>resources<br>officer<br>(n=4) | 0              | 2                 | 2                  | 0              | 0                      | 1                  | 3                     |
